# Supplementary material
Source: PubMed Central journal article supplement (PMC5838786)
Supplement: jama-319-559-s002.pdf [file jama-319-559-s002.pdf]

1 **1 STATISTICAL ASPECTS**

2 **1.1 Description of statistical methods to be used including the timetable for the**  
3 **planned interim analyses**

4 No interim analysis is planned.

5 Baseline characteristics of patients will be described according to group of  
6 intervention. Continuous variables will be summarized using descriptive statistics, i.e  
7 number of subjects, mean, median, standard deviation (s.d), inter quartile range,  
8 minimum and maximum. Qualitative variables will be summarized by frequency and  
9 percentage.

10 Principal criteria analysis:

11 Since this is a non-inferiority study, analysis of the principal criterion will be  
12 performed on per protocol population. Secondary analysis will be performed on ITT  
13 population. Thrombo-embolic event (TE event) will be defined by: DVT (assessed by  
14 proximal compression ultrasonography) or PE (a CTPA or angiography showing  
15 intraluminal defect, or a Ventilation/Perfusion lung scan showing a high-probability  
16 pattern). The decision rule will be based on the upper bound of the 90% two sided  
17 confidence interval of the difference of percentage of TE events between groups.

18 If the upper bound of the confidence interval is above the 1.5% of difference, the non  
19 inferiority hypothesis of the intervention group will be rejected. Dunnett and Gent  
20 chisquare test will also be performed.

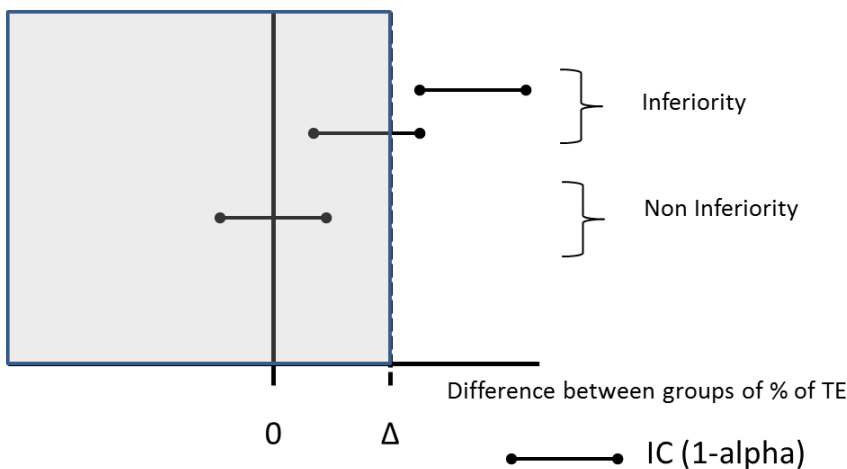

21  
22 Secondary analysis will be performed on ITT population. Considering cluster  
23 randomization, confirmatory analysis will be performed using generalized estimating

24 equation (GEE) assuming an exchangeable correlation matrix structure and  
25 considering clustering at site level. Secondary criteria will be compared under  
26 superiority hypothesis and on ITT population. Descriptive analysis will be performed.  
27 Superiority approach will be used to compare secondary evaluation criteria between  
28 groups. The ED length stay and the mean of hospital admission following the ED visit  
29 will be compared using mixed model considering center as random effect.

30 Unnecessary irradiative imaging, adverse events and Deaths at 3 months will be  
31 compared using generalized estimating equation (GEE) assuming an exchangeable  
32 correlation matrix structure and considering clustering at site level.

### 33 **1.2 Calculation hypotheses for the number of subjects required and the result**

34 According to recent large European cohorts, we estimate that the rate of primary  
35 endpoint in our control group will be 1.5%<sup>32,33,48</sup>.

36 To be regarded as non-inferior, the maximal difference in proportions between two  
37 groups (Delta) should not exceed 1.5% - an absolute rate of primary event of 3% in  
38 the intervention group. This failure rate corresponds to the upper bound of observed  
39 rate after a negative CPTA and is a widely accepted criterion for the validation of  
40 diagnostic strategies for PE<sup>49</sup>. This rate is in line with previous landmark studies that  
41 comprise the basis of our current understanding.

42 Sample size under non inferiority hypothesis:

43 To assess non inferiority of the "PERC strategy", with alpha = 5%, beta=20%, one  
44 sided, N1= 1624 subjects are needed (East 6, Cytel).

45

46 Cluster design effect hypothesis:

47 A cluster is a 6 months period for one site.

48 Intra class correlation coefficient (ICCC)=0.002

49 Mean cluster size (m)= 60 patients

50 Cluster design effect:  $D = (1 + (m - 1) \times ICC) = 1.118$

51

52 Sample size taking cluster design effect into account:

53 Sample size needed =  $D \times N1 = 1815$  patients

54 With 15 sites that is 30 clusters, 61 subjects per site per period are required and will  
55 lead to 1830 subjects.

56 **1.3 Anticipated level of statistical significance**

57 Non inferiority analysis cf. above.

58 All superiority test will be performed at 5%.

59 **1.4 Statistical criteria for termination of the research.**

60 Not applicable

61 **1.5 Method for taking into account missing, unused or invalid data**

62 Missing data will not be replaced except for the principal criteria for the secondary  
63 ITT analysis. Missing value will be considered as an event whatever the group  
64 randomized.

65 **1.6 Management of modifications made to the analysis plan for the initial strategy.**

66 Modification made in analysis will be documented in the final report.

67 **1.7 Selection of populations**

68 Per protocol population: real strategy applied whatever the group allocated

69 ITT population: sites according to the randomized group even if the strategy allocated  
70 was not applied.

71

72 Modifications made to the analysis plan – May 2017:

73 Since there is only one TE event observed at month 3 in the per protocol population,  
74 generalized estimating equation was not performed for the analysis of the principal  
75 criterion and the Dunnett p-value could not be calculated.

76 Secondary objectives were analysed as follow: qualitative variables were compared  
77 using Pearson's chi-square test or Fisher exact test and continuous variables were  
78 compared using a Wilcoxon rank-sum test. The prevalence of PE at baseline was  
79 compared using Pearson's chi-square test or Fisher exact test.

80

81 Posthoc sensitivity analyses – December 2017:

82 There was an inclusion bias leading to a different profile of patients in the two groups:  
83 more very low risk patients were included in the PERC group, as can be seen in  
84 regards to the rate of PERC negative patients in the two groups: 48% in the PERC  
85 group and 38% in the control group.

86 We performed two posthoc sensitivity analyses with the aim of comparing groups of  
87 patients with the same risk of PE.

88 The first posthoc sensitivity analysis was made after removing a random sample  
89 (computer generated) of 150 PERC negative patients in the PERC group. The  
90 second one was made after the addition of 175 PERC negative patients to the control  
91 group. The same statistical plan was used for these posthoc analyses.

92
