# Supplementary material
Source: PubMed Central journal article supplement (PMC5838786)
Supplement: jama-319-559-s003.pdf [file jama-319-559-s003.pdf]

## Supplementary Online Content

Freund Y, Cachanado M, Aubry A, et al. Effect of the pulmonary embolism rule-out criteria on subsequent thromboembolic events among low-risk emergency department patients: the PROPER randomized clinical trial. *JAMA*. doi:10.1001/jama.2017.21904

**eTable 1.** Characteristics of Participating Emergency Departments

**eTable 2.** Clinical Probability and PERC Score

**eTable 3.** Posthoc Sensitivity Analyses

**eTable 4.** Initial Diagnosis of Pulmonary Embolism in the Emergency Department

This supplementary material has been provided by the authors to give readers additional information about their work.

| Emergency department        | Annual census | Patients recruited (N, %) | Setting    | Trainees (N) | Senior emergency physicians (N) | Mean years in practice of senior emergency physicians |
|-----------------------------|---------------|---------------------------|------------|--------------|---------------------------------|-------------------------------------------------------|
| Pitie-salpetriere (Paris)   | 66 000        | 589 (0.8%)                | Urban      | 10           | 25                              | 6                                                     |
| Saint Antoine (Paris)       | 65 000        | 164 (0.3%)                | Urban      | 9            | 25                              | 5                                                     |
| Tenon (Paris)               | 44 000        | 98 (0.2%)                 | Urban      | 7            | 13                              | 5                                                     |
| Cochin (Paris)              | 55 000        | 100 (0.2%)                | Urban      | 9            | 22                              | 7                                                     |
| Bichat (Paris)              | 80 000        | 70 (0.08%)                | Urban      | 10           | 28                              | 5                                                     |
| Lariboisiere (Paris)        | 79 000        | 91 (0.1%)                 | Urban      | 12           | 25                              | 7                                                     |
| HEGP (Paris)                | 50 000        | 139 (0.3%)                | Urban      | 8            | 21                              | 7                                                     |
| Avicenne (Bobigny)          | 40 000        | 212 (0.5%)                | Urban      | 6            | 13                              | 5                                                     |
| Saint Camille (Bry s Marne) | 44 000        | 37 (0.08%)                | Urban      | 6            | 14                              | 5                                                     |
| Mondor (Créteil)            | 53 000        | 55 (0.1%)                 | Urban      | 10           | 18                              | 3                                                     |
| Ambroise Paré (Boulogne)    | 38 000        | 79 (0.2%)                 | Urban      | 8            | 14                              | 10                                                    |
| Purpan-Rangueil (Toulouse)  | 37 000        | 115 (0.3%)                | Urban      | 11           | 20                              | 8                                                     |
| Minjoz (Besançon)           | 30 000        | 84 (0.3%)                 | Semi Rural | 10           | 22                              | 8                                                     |
| Edouard Herriot (Lyon)      | 70 000        | 83 (0.11%)                | Urban      | 14           | 36                              | 5                                                     |

**Supplemental Table 1: Characteristics of participating emergency departments.**

All centers were academic emergency departments, adult only, saw both medical and surgical patients and have 24/7 coverage by a senior emergency physician. Trainees are post-graduate young doctors in their 3 to 6 years internship. Senior emergency physicians are board certified physicians who completed their training.

**Posthoc sensitivity analysis 1: Exclusion of 150 patients with PERC=0 in the PERC group**

|                                 | <b>PERC</b>  | <b>Control</b> |
|---------------------------------|--------------|----------------|
| <b>ITT population</b>           | <b>n=812</b> | <b>n=954</b>   |
| <b>PERC=0</b>                   | 309 (38%)    | 364 (38%)      |
| <b>RGS &lt;2</b>                | 677 (83%)    | 772 (81%)      |
| <b>RGS ≥2 and &lt;5</b>         | 135 (17%)    | 182 (19%)      |
| <b>Wells score &lt;2</b>        | 729 (90%)    | 746 (78%)      |
| <b>Wells score ≥2 and &lt;6</b> | 75 (9%)      | 178 (19%)      |
| <b>Wells score &gt;6</b>        | 8 (1%)       | 30 (3%)        |

**Posthoc sensitivity analysis 2: Addition of 175 patients with PERC=0 in the Control group**

|                                 | <b>PERC</b>  | <b>Control</b> |
|---------------------------------|--------------|----------------|
| <b>ITT population</b>           | <b>n=962</b> | <b>n=1129</b>  |
| <b>PERC=0</b>                   | 459 (48%)    | 539 (48%)      |
| <b>RGS &lt;2</b>                | 827 (86%)    | 947 (84%)      |
| <b>RGS ≥2 and &lt;5</b>         | 135 (14%)    | 182 (16%)      |
| <b>Wells score &lt;2</b>        | 875 (91%)    | 921 (81%)      |
| <b>Wells score ≥2 and &lt;6</b> | 79 (8%)      | 178 (16%)      |
| <b>Wells score &gt;6</b>        | 8 (1%)       | 30 (3%)        |

**Supplemental Table 2:** Clinical probability and PERC score. PERC: Pulmonary Embolism Rule-out Criteria. RGS: Revised Geneva Score

### Posthoc sensitivity analysis 1: Exclusion of 150 patients with PERC=0 in the PERC group

|                                          | PERC<br>n=812 | Control<br>n=954 | Difference | [95%CI]        | p      |
|------------------------------------------|---------------|------------------|------------|----------------|--------|
| <b>ITT population</b>                    |               |                  |            |                |        |
| Primary outcome (TE event at 3 months)   | 32 (4%)       | 29 (3%)          | 0.9%       | ]-∞ ; 2.4%]    | 0.49   |
| CTPA performed                           | 129 (16%)     | 220 (23%)        | 7.2%       | [3.4% ; 11.0%] | <0.001 |
| Hospital admission                       | 116 (14%)     | 152 (16%)        | -1.6%      | [-5.1% ; 1.8%] | 0.34   |
| Anticoagulation therapy introduced       | 21 (3%)       | 33 (3%)          | 0.9%       | [-0.8% ; 2.6%] | 0.29   |
| Re admission to the hospital at 3 months | 40 (5%)       | 62 (7%)          | 1.6%       | [-0.8% ; 3.9%] | 0.17   |
| All causes death at 3 months             | 3 (0.4%)      | 2 (0.2%)         | 0.2%       | [-0.5% ; 0.8%] | 0.52   |
| <b>Per protocol population</b>           | <b>n=697</b>  | <b>n=902</b>     |            |                |        |
| Primary outcome (TE event at 3 months)   | 1 (0.1%)      | 0 (0%)           | 0.1%       | ]-∞ ; 0.8%]    |        |
| CTPA performed                           | 114 (16%)     | 211 (23%)        | 7.0%       | [3.0% ; 11.1%] | <0.001 |
| Hospital admission                       | 96 (14%)      | 139 (15%)        | -1.6%      | [-5.2% ; 2.0%] | 0.36   |
| Anticoagulation therapy introduced       | 19 (3%)       | 28 (3%)          | 0.4%       | [-1.4% ; 2.2%] | 0.66   |
| Re admission to the hospital at 3 months | 35 (5%)       | 62 (7%)          | 1.8%       | [-0.6% ; 4.3%] | 0.12   |
| All causes death at 3 months             | 1 (0.1%)      | 1 (0.1%)         | 0.0%       | [-0.4% ; 0.5%] | 0.85   |

### Posthoc sensitivity analysis 2: Addition of 175 patients with PERC=0 in the Control group

|                                          | PERC<br>n=962 | Control<br>n=1129 | Difference | [95%CI]        | p      |
|------------------------------------------|---------------|-------------------|------------|----------------|--------|
| <b>ITT population</b>                    |               |                   |            |                |        |
| Primary outcome (TE event at 3 months)   | 32 (3%)       | 29 (3%)           | 0.8%       | ]-∞ ; 2.0%]    |        |
| CTPA performed                           | 129 (13%)     | 220 (19%)         | 6.0%       | [2.8% ; 9.3%]  | <0.001 |
| Hospital admission                       | 121 (13%)     | 152 (13%)         | -0.9%      | [-3.9% ; 2.1%] | 0.55   |
| Anticoagulation therapy introduced       | 21 (2%)       | 33 (3%)           | 0.7%       | [-0.7% ; 2.2%] | 0.29   |
| Re admission to the hospital at 3 months | 43 (4%)       | 62 (6%)           | 1.0%       | [-1.0% ; 3.0%] | 0.30   |
| All causes death at 3 months             | 3 (0.3%)      | 2 (0.2%)          | 0.1%       | [-0.4% ; 0.7%] | 0.52   |
| <b>Per protocol population</b>           | <b>n=847</b>  | <b>n=1077</b>     |            |                |        |
| Primary outcome (TE event at 3 months)   | 1 (0.1%)      | 0 (0%)            | 0.1%       | ]-∞% ; 0.7%]   |        |
| CTPA performed                           | 114 (14%)     | 211 (20%)         | 6.1%       | [2.7% ; 9.5%]  | <0.001 |
| Hospital admission                       | 101 (12%)     | 139 (13%)         | -1.0%      | [-4.0% ; 2.1%] | 0.52   |
| Anticoagulation therapy introduced       | 19 (2%)       | 28 (3%)           | 0.4%       | [-1.1% ; 1.8%] | 0.61   |
| Re admission to the hospital at 3 months | 38 (4%)       | 62 (6%)           | 1.3%       | [-0.8% ; 3.3%] | 0.21   |
| All causes death at 3 months             | 1 (0.1%)      | 1 (0.1%)          | 0.0%       | [-0.4% ; 0.4%] | 0.86   |

**Supplemental table 3:** posthoc analyses of primary and secondary endpoints. ITT: intention to treat. NNT: number needed to treat. TE: thromboembolic. CTPA: Computed tomographic pulmonary angiography. ED: emergency department. IQR: inter-quartile range.

|                                          | <b>PERC group</b> | <b>Control group</b> |                       |      |
|------------------------------------------|-------------------|----------------------|-----------------------|------|
| <b>ITT population posthoc analysis 1</b> | <b>n=812</b>      | <b>n=954</b>         | Difference (95%CI)    | p    |
| Pulmonary embolism                       | 14 (1.7%)         | 26 (2.7%)            | 1.0% (-0.04% to 2.4%) | 0.16 |
| <b>ITT population posthoc analysis 2</b> | <b>n=962</b>      | <b>n=1129</b>        |                       |      |
| Pulmonary embolism                       | 14 (1.5%)         | 25 (2.3%)            | 0.8% (-0.3% to 2.1%)  | 0.16 |

**Supplemental table 4:** Initial diagnosis of pulmonary embolism in the emergency department.
